# Supplementary material for: Topological crossing in the misfolded Tetrahymena ribozyme resolved by cryo-EM
Source: PubMed Central journal article supplement — Proc Natl Acad Sci U S A. 2022 Sep 6;119(37):e2209146119. doi: 10.1073/pnas.2209146119 (PMC9477386; doi:10.1073/pnas.2209146119), 2022-09-06
Supplement: pnas.2209146119.sapp.pdf [file pnas.2209146119.sapp.pdf]

## Supplementary Information for

### Topological Crossing in the Misfolded Tetrahymena Ribozyme Resolved by Cryo-EM

Shanshan Li<sup>1,2</sup>, Michael Z. Palo<sup>3</sup>, Greg Pintilie<sup>2</sup>, Xiaojing Zhang<sup>1</sup>, Zhaoming Su<sup>2,4</sup>, Kalli Kappel<sup>3</sup>, Wah Chiu<sup>2,5\*</sup>, Kaiming Zhang<sup>1,2\*</sup>, Rhiju Das<sup>3,6\*</sup>

<sup>1</sup>MOE Key Laboratory for Cellular Dynamics and Division of Life Sciences and Medicine, University of Science and Technology of China, Hefei 230027, China

<sup>2</sup>Department of Bioengineering, Stanford University, Stanford, CA 94305, USA

<sup>3</sup>Department of Biochemistry, Stanford University, Stanford, CA 94305, USA

<sup>4</sup>The State Key Laboratory of Biotherapy, Department of Geriatrics and National Clinical Research Center for Geriatrics, West China Hospital, Sichuan University, Chengdu, Sichuan 610044, China

<sup>5</sup>CryoEM and Bioimaging Division, Stanford Synchrotron Radiation Lightsource, SLAC National Accelerator Laboratory, Stanford University, Menlo Park, CA 94025, USA

<sup>6</sup>Department of Physics, Stanford University, Stanford, CA 94305, USA

\*Corresponding author.

Emails: wahc@stanford.edu, kmzhang@ustc.edu.cn, rhiju@stanford.edu

#### This PDF file includes:

Figures S1 to S6

Table S1

Legends for Movies S1 to S3

#### Other supplementary materials for this manuscript include the following:

Movies S1 to S3

A

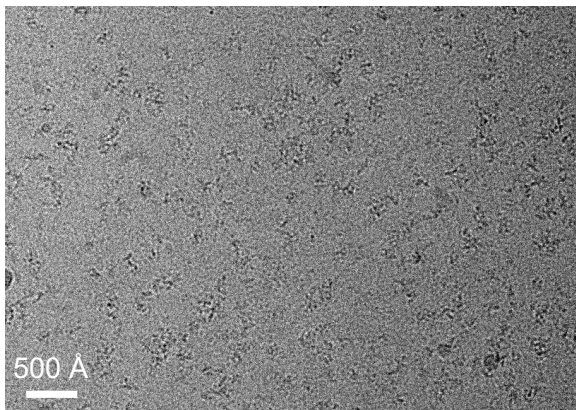

B

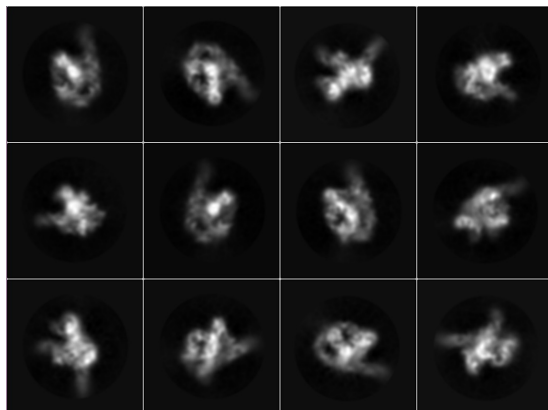

41  
42 **Fig. S1. Single-particle cryo-EM analysis of Tetrahymena ribozyme.** A. Representative  
43 motion-corrected cryo-EM micrograph. B. Reference-free 2D class averages.

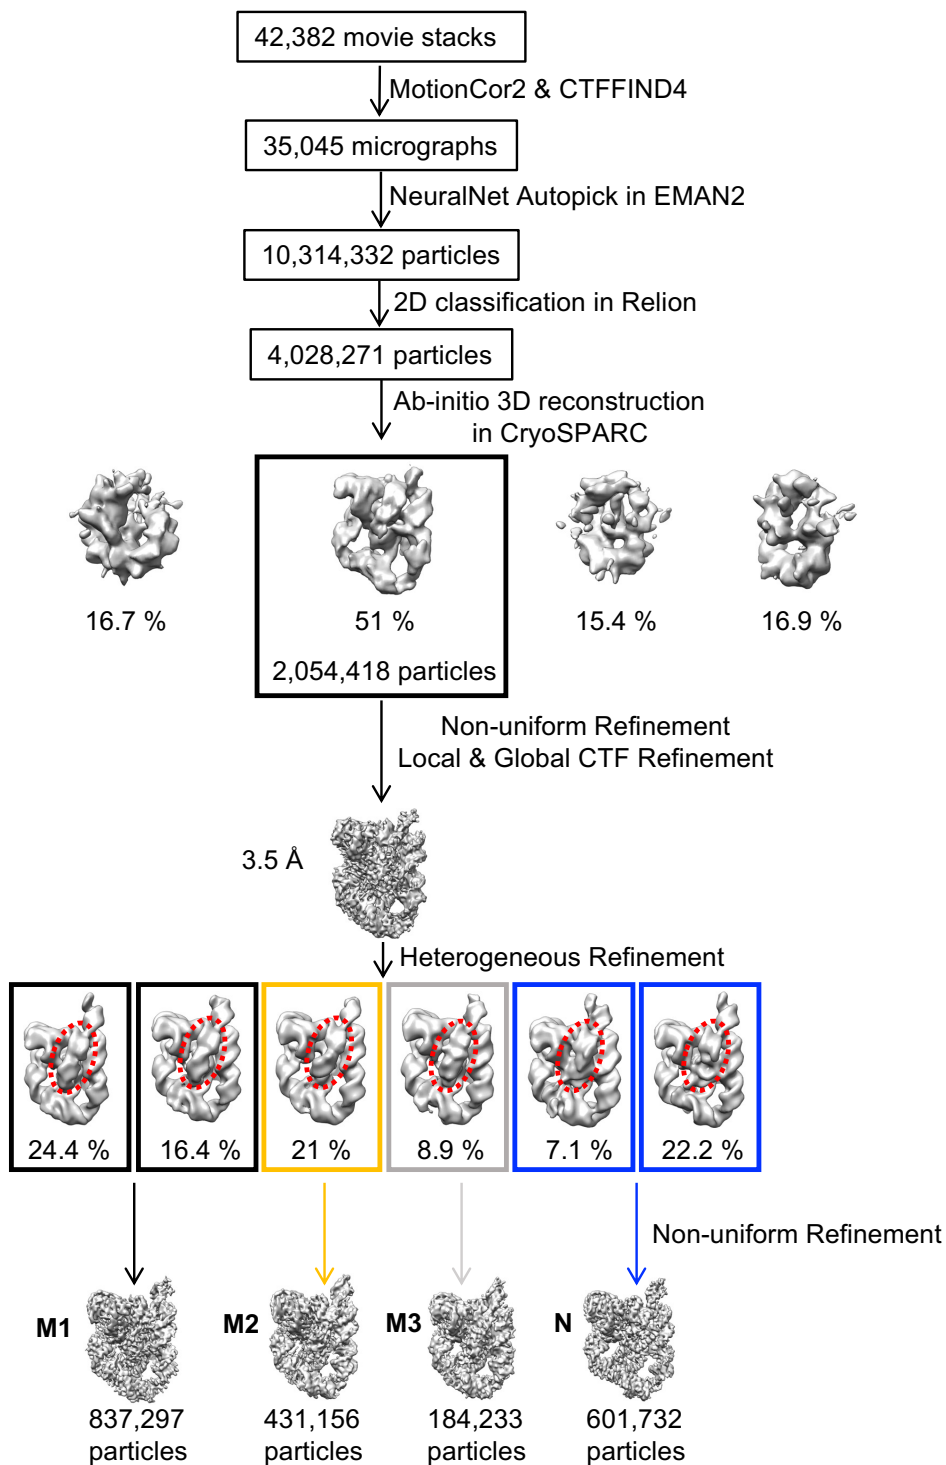

44  
45  
46  
47  
48  
49  
50

**Fig. S2. Workflow of the single-particle cryo-EM data processing.** A total of 42,382 movie stacks were collected on a 300 kV Titan Krios cryo-electron microscope. cryoSPARC was used to resolve structural heterogeneity and four conformations were obtained. Detailed data processing procedures are described in “Materials and methods”.

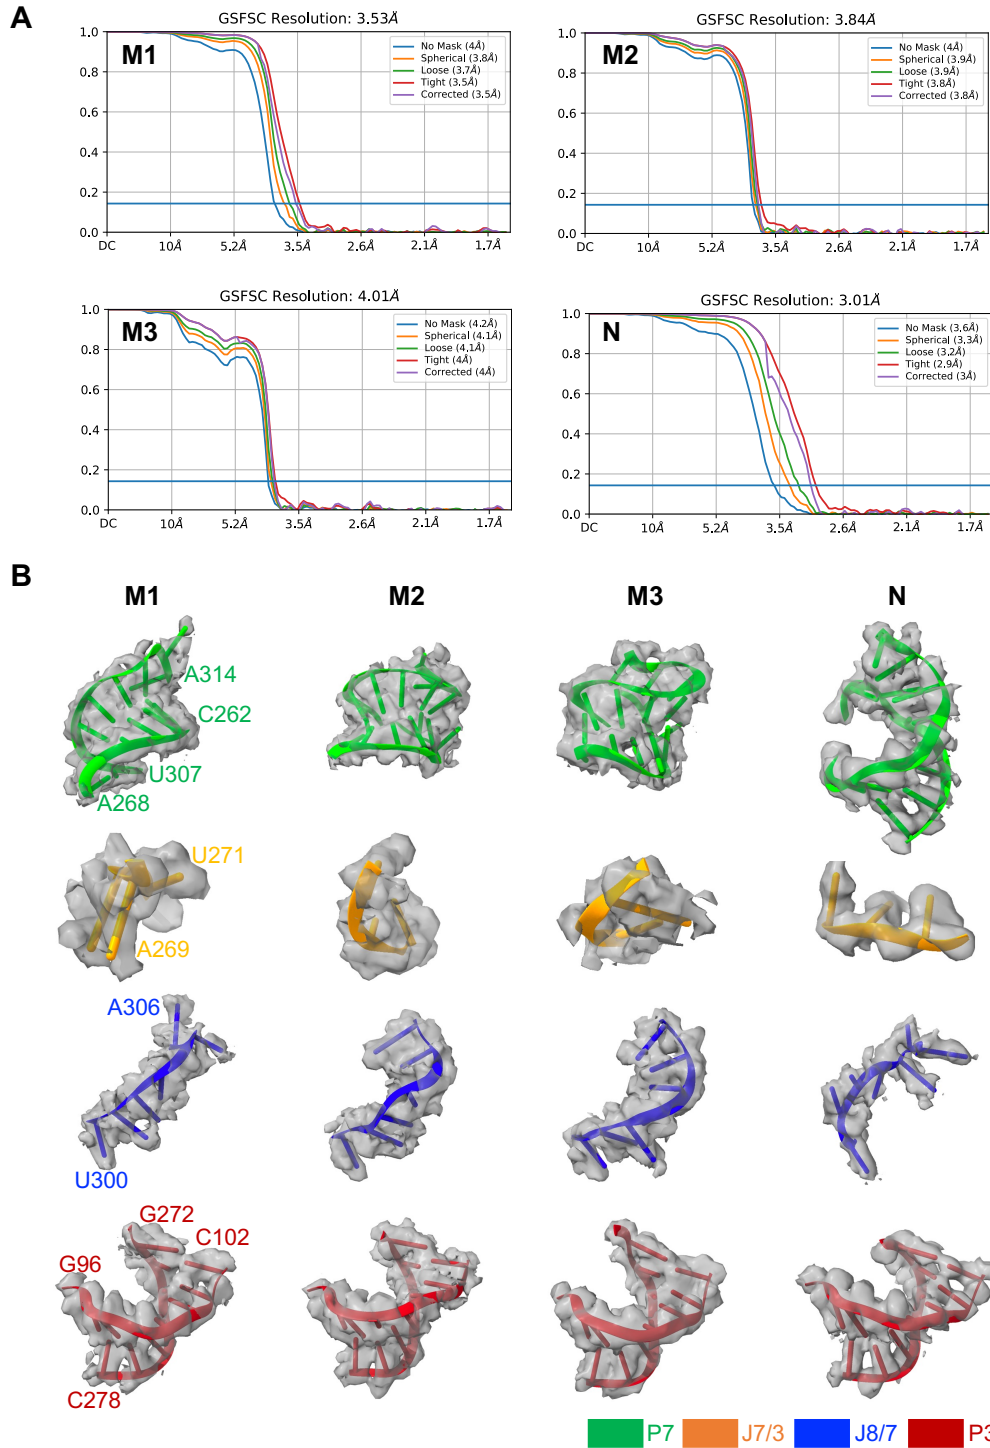

51  
52  
53  
54

**Fig. S3. Resolutions of four states of *Tetrahymena* ribozyme.** A. Gold standard FSC plots calculated in cryoSPARC. B. Zoom-in views show examples of atomic models fitted to cryo-EM densities in the catalytic core.

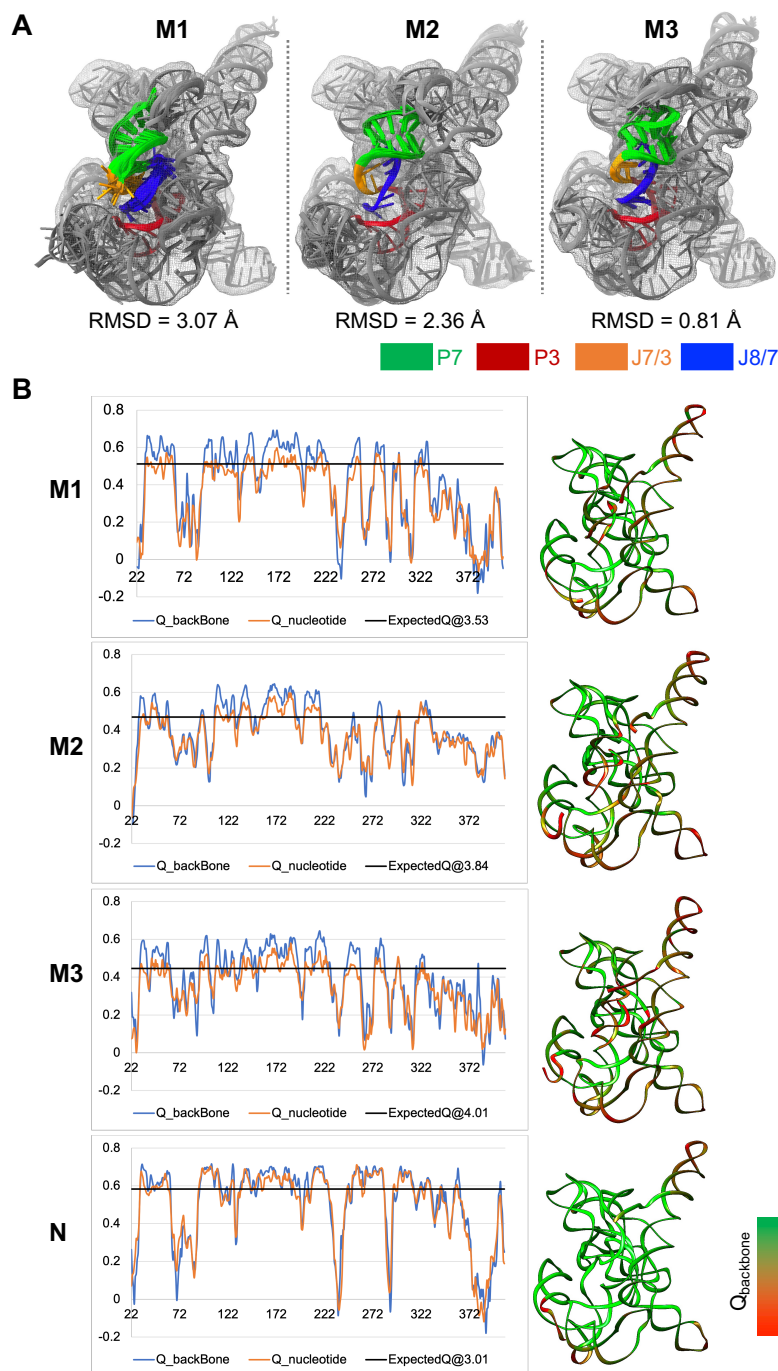

55

56 **Fig. S4. Model building of the M substates and the N state.** A. Convergence of models built by  
 57 DRRAFTER. The top 10 models produced by DRRAFTER were well-converged for P7, P3, J7/3,  
 58 and J8/7 regions, with RMSD labeled. B. Model validation using Q-scores. The black line  
 59 represents the expected Q-score at respective resolution based on the correlation between Q-scores  
 60 and map resolution. Colored models of ribozyme based on Q-score per backbone are shown on the  
 61 right panel.

62

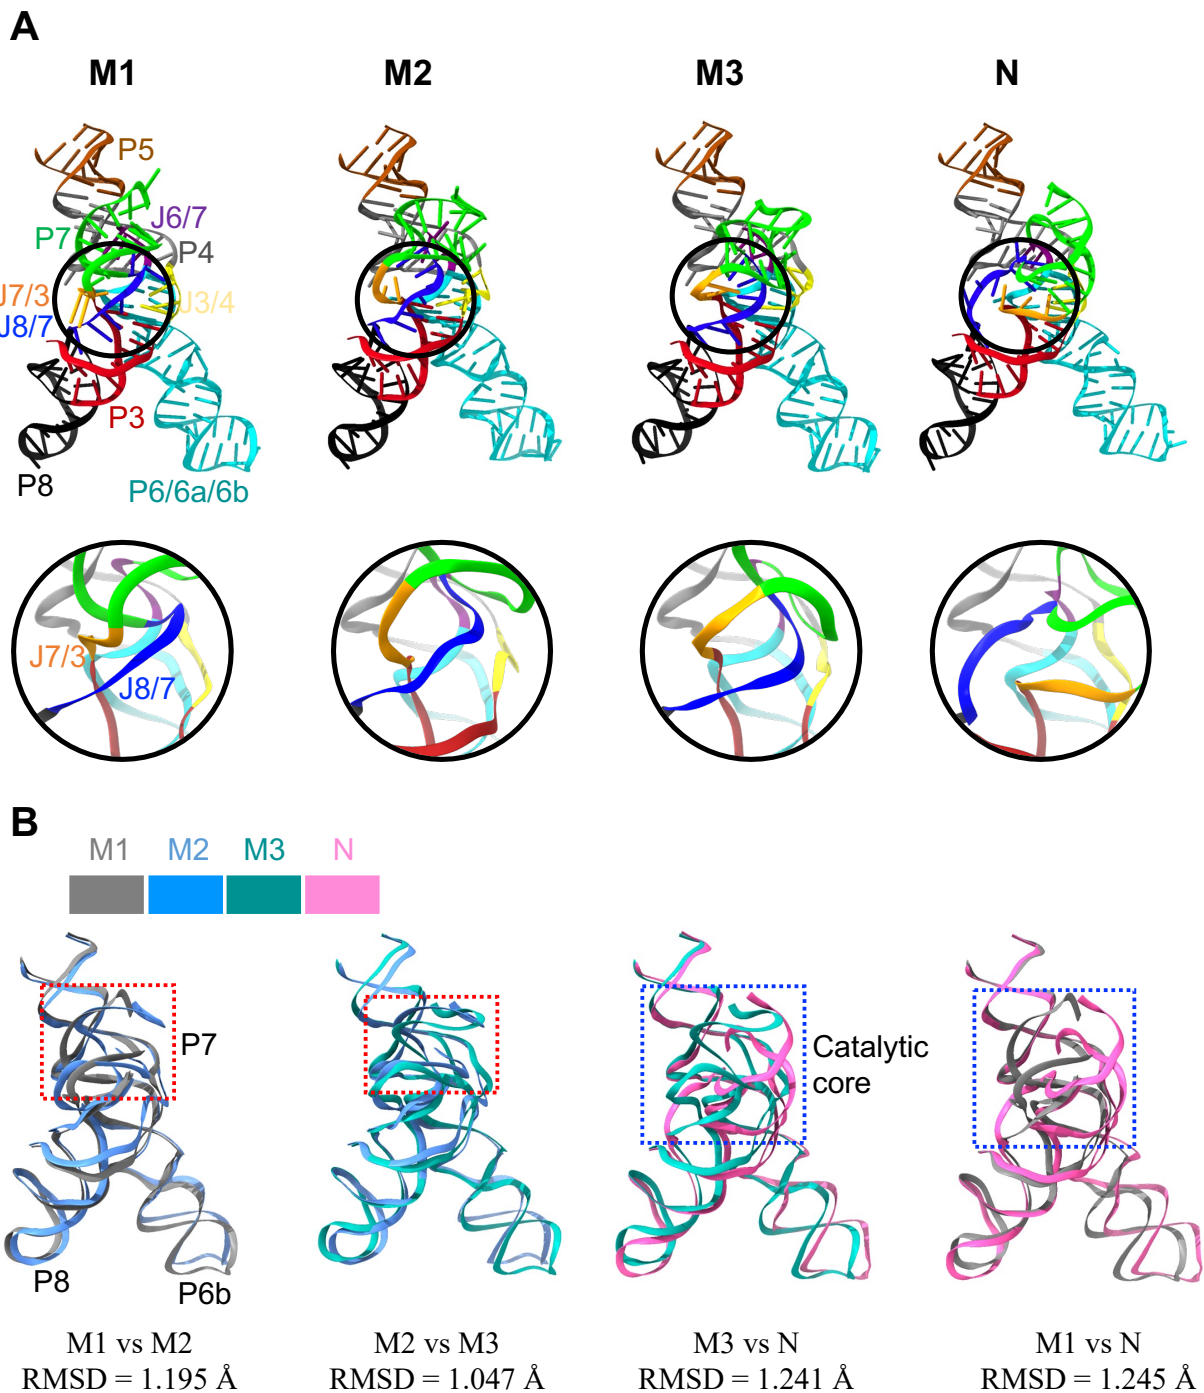

63

64 **Fig. S5. Comparison of M with N at the enzyme core.** A. The enzyme core consists of eight  
 65 paired and single-stranded regions shown in distinct colors. Zoom-in view illustrates the  
 66 topological cross between J7/3 and J8/7. B. Overlaying cryo-EM models of M and N states reveals  
 67 extensive native core with local rearrangements at the catalytic core.

68

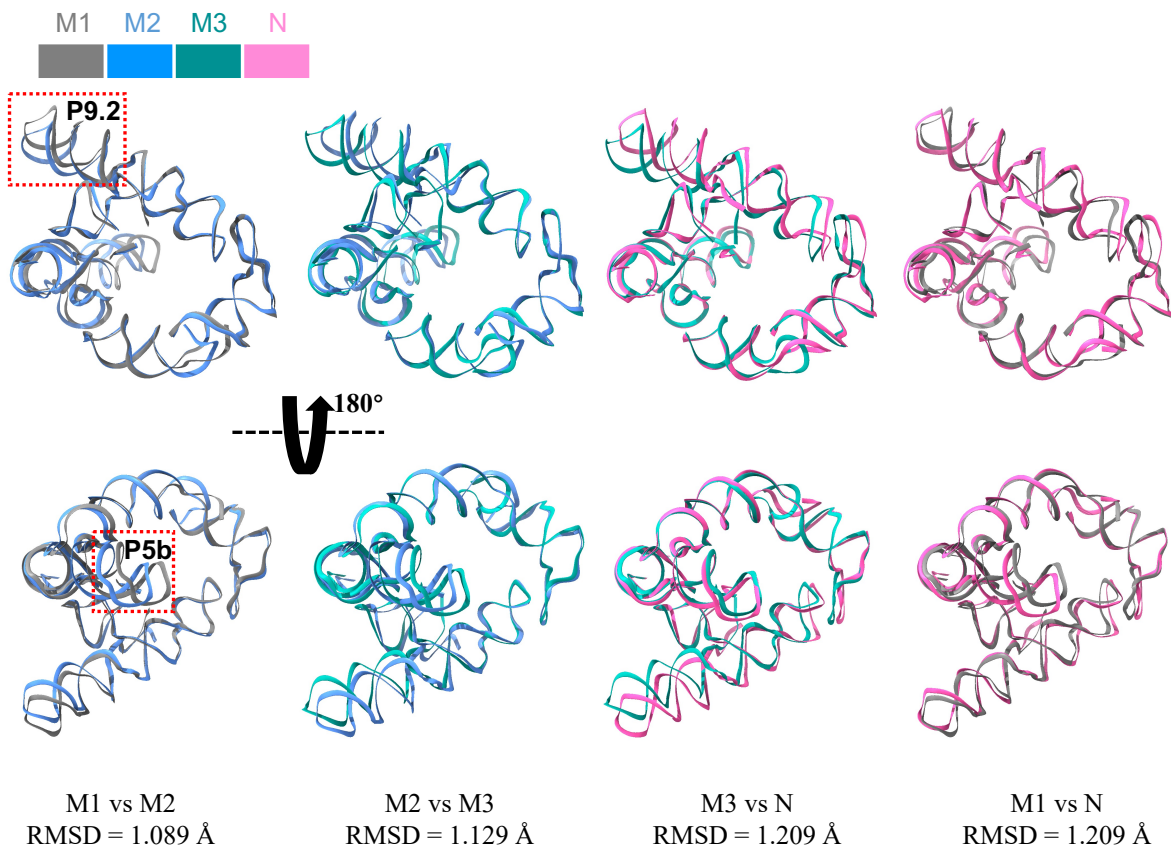

69

70 **Fig. S6. Comparison of M with N at the peripheral region.** Overlaying these models reveals  
 71 extensive native peripheral structure.

72

73

74

75

76

77

78

79

80

81

82

83

84

85

86

87

88

89 **Table S1. Cryo-EM data collection, processing, and model validation**

|                                                     |                                        | <i>Tetrahymena</i> ribozyme |         |         |  |
|-----------------------------------------------------|----------------------------------------|-----------------------------|---------|---------|--|
| <b>Data collection and processing</b>               |                                        |                             |         |         |  |
| Microscope                                          | Titan Krios G3i                        |                             |         |         |  |
| Voltage (kV)                                        | 300                                    |                             |         |         |  |
| Camera                                              | Gatan K3                               |                             |         |         |  |
| Grids Type                                          | R2/1 Quantifoil copper grid (200 mesh) |                             |         |         |  |
| Sample concentration                                | ~25 $\mu$ M                            |                             |         |         |  |
| Magnification                                       | 105,000 $\times$                       |                             |         |         |  |
| C2 aperture size ( $\mu$ m)                         | 70                                     |                             |         |         |  |
| Objective aperture size ( $\mu$ m)                  | 100                                    |                             |         |         |  |
| Pixel size ( $\text{\AA}$ )                         | 0.82                                   |                             |         |         |  |
| Total exposure ( $e^-/\text{\AA}^2$ )               | 51.3                                   |                             |         |         |  |
| Exposure time (s)                                   | 3                                      |                             |         |         |  |
| Number of frames per exposure                       | 30                                     |                             |         |         |  |
| Energy filter slit width (eV)                       | 20                                     |                             |         |         |  |
| Data collection software                            | EPU 2.7                                |                             |         |         |  |
| Number of exposures per hole                        | 4                                      |                             |         |         |  |
| Defocus range ( $\mu$ m)                            | -1.2 - -2.8                            |                             |         |         |  |
| Number of micrographs collected                     | 42,382                                 |                             |         |         |  |
| Number of micrographs used                          | 35,045                                 |                             |         |         |  |
| Number of initial particles                         | 10,314,332                             |                             |         |         |  |
| Conformations                                       | M1                                     | M2                          | M3      | N       |  |
| Symmetry                                            | C1                                     | C1                          | C1      | C1      |  |
| Number of final particles                           | 837,297                                | 431,156                     | 184,233 | 601,732 |  |
| Resolution (0.143 gold standard FSC, $\text{\AA}$ ) | 3.53                                   | 3.84                        | 4.01    | 3.01    |  |
| <b>Atomic model refinement</b>                      |                                        |                             |         |         |  |
| Software                                            | phenix                                 | phenix                      | phenix  | phenix  |  |
| Clashscore, all atoms                               | 6.98                                   | 8.02                        | 6.98    | 10.45   |  |
| MolProbity score                                    | 2.53                                   | 2.59                        | 2.53    | 2.69    |  |
| Bad bonds (%)                                       | 0                                      | 0                           | 0       | 0       |  |
| Bad angles (%)                                      | 0                                      | 0                           | 0       | 0.01    |  |

90

91

92

93

94

**Legends for Movies S1 to S3**

95

96

**Movie S1.** The topological difference between M and N.

97

98

**Movie S2.** The similarity of three M substates including M1, M2, and M3.

99

100

**Movie S3.** A possible M-to-N refolding pathway.

101

102

103

104
